# Supplementary material for: Axon Biology in ALS: Mechanisms of Axon Degeneration and Prospects for Therapy
Source: PubMed Central journal article supplement (PMC9587191; doi:10.1007/s13311-022-01297-6), 2022-10-07
Supplement: 13311_2022_1297_MOESM2_ESM.pdf [file 13311_2022_1297_MOESM2_ESM.pdf]

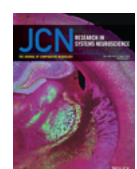

A compensatory subpopulation of motor neurons in a mouse model of amyotrophic lateral sclerosis  
 Author: Jeff W. Lichtman, Joshua R. Sanes, Anneliese M. Schaefer  
 Publication: Journal of Comparative Neurology  
 Publisher: John Wiley and Sons  
 Date: Aug 4, 2005  
 Copyright © 2005 Wiley-Liss, Inc.

Order Completed

Thank you for your order.

This Agreement between Michael P Coleman ("You") and John Wiley and Sons ("John Wiley and Sons") consists of your order details and the terms and conditions provided by John Wiley and Sons and Copyright Clearance Center.

License number Reference confirmation email for license number  
 License date Sep, 01 2022

Licensed Content

Licensed Content Publisher John Wiley and Sons  
 Licensed Content Publication Journal of Comparative Neurology  
 Licensed Content Title A compensatory subpopulation of motor neurons in a mouse model of amyotrophic lateral sclerosis  
 Licensed Content Author Jeff W. Lichtman, Joshua R. Sanes, Anneliese M. Schaefer  
 Licensed Content Date Aug 4, 2005  
 Licensed Content Volume 490  
 Licensed Content Issue 3  
 Licensed Content Pages 11

Order Details

Type of use Journal/Magazine  
 Requestor type Publisher (STM Signatory)  
 STM publisher name Springer Nature  
 Is the reuse sponsored by or associated with a pharmaceutical or medical products company? no  
 Format Print and electronic  
 Portion Figure/table  
 Number of figures/tables 1  
 Will you be translating? No  
 Circulation 1000 - 1999

About Your Work

Title of new article Axon Biology in ALS: Mechanisms of axon degeneration and prospects for therapy  
 Lead author Michael Coleman  
 Title of targeted journal Neurotherapeutics  
 Publisher Springer Nature  
 Expected publication date Oct 2022

Additional Data

Portions Figure 5b

Requestor Location

Michael P Coleman  
 The Babraham Institute  
 Babraham  
 Cambridge, other CB22 3AT  
 United Kingdom  
 Attn: Michael P Coleman

Tax Details

Publisher Tax ID EU826007151  
 Customer VAT ID GB823847609

Billing Information

Billing Type Invoice  
 Michael P Coleman  
 John van Geest Centre for Brain Repair  
 Robinson Way  
 Cambridge  
 Cambridge, United Kingdom CB2 0PY  
 Attn: Michael P Coleman  
 Billing address

Price

Total 0.00 GBP

Would you like to purchase the full text of this article? If so, please continue on to the content ordering system located here: [Purchase PDF](#)  
 If you click on the buttons below or close this window, you will not be able to return to the content ordering system.

Total: 0.00 GBP

CLOSE WINDOW
